# Supplementary material
Source: PubMed Central journal article supplement (PMC4412610)
Supplement: NIHMS682469-supplement-supplement_1.pdf [file NIHMS682469-supplement-supplement_1.pdf]

## Supporting Information

Figure S1: (A) Preformed class I DSA most often resolved after SLKT; however, (B) class II DSA is much more commonly persistent

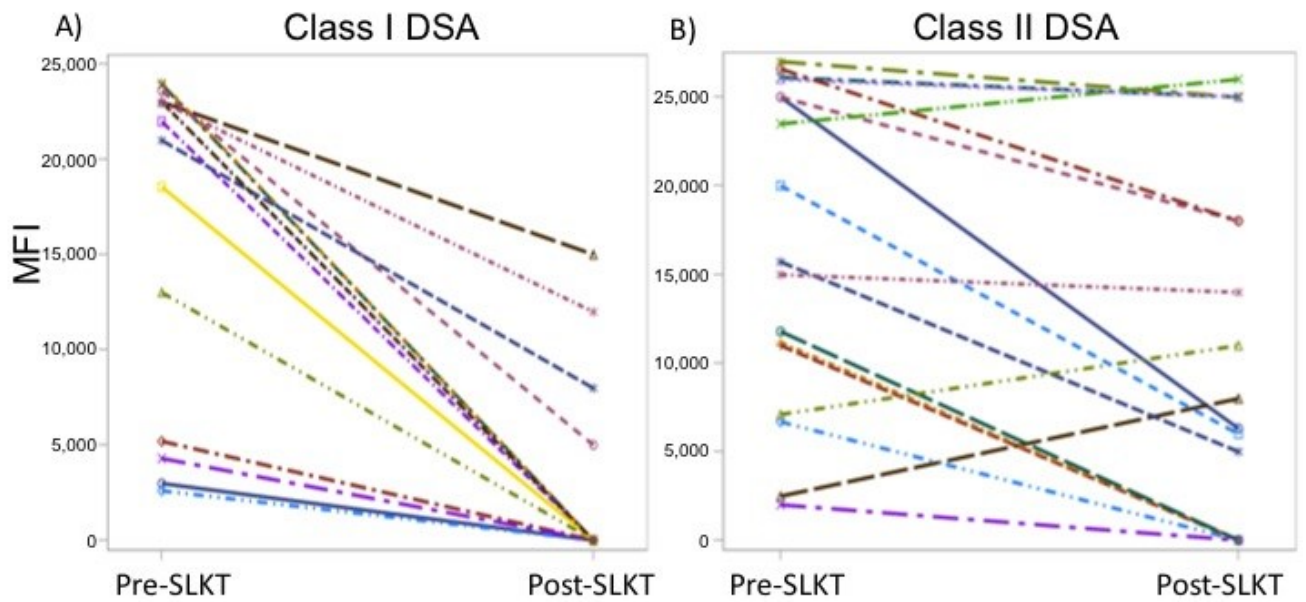

Supplemental Figure 1: (A) Preformed Class I DSA most often resolve after SLKT; however, (B) Class II DSA is much more commonly persistent.
